1  
2  
3  
4  
5  
6  
7  
8  
9  
10

Corresponding Author: Full Name  
Full mailing address  
Phone:  
Email:

**Red harvester ant (Order: Hymenoptera) preference for cover crop seeds in South Texas**

Lilly Elliott<sup>1</sup>, Daniella Rivera<sup>2</sup>, Adrian Noval<sup>2</sup>, Robin A. Choudhury<sup>3</sup>, Hannah J. Penn<sup>4</sup>

1. University of Texas Rio Grande Valley, School of Earth, Environmental, and Marine Science, 1201 W. University Dr., Edinburg, TX, USA 78539
2. University of Texas Rio Grande Valley, Department of Biology, 1201 W. University Dr., Edinburg, TX, USA 78539
3. University of Texas Rio Grande Valley, School of Earth, Environmental, and Marine Science, 1201 W. University Dr., Edinburg, TX, USA 78539
4. USDA ARS Sugarcane Research Unit, 5883 Usda Rd., Houma, LA, USA 70360

11 **Abstract:**

12 Harvester ants are known to selectively forage seeds, potentially impacting nearby plant  
13 community composition. In agricultural areas, harvester ants may be viewed as pests by foraging  
14 on crop seeds or as beneficials by preferentially removing weed seeds. However, little work has  
15 been done on harvester ant preferences for cover crop seeds. Local observations suggest that ants  
16 may take cover crop seeds, but no studies have evaluated ant agricultural impacts or seed  
17 preferences in the Lower Rio Grande Valley (LRGV). We examined red harvester ant  
18 (*Pogonomyrmex barbatus* Smith) preferences for commonly used cover crop seeds in the LRGV  
19 (vetch, oat, fescue, sunn hemp, and radish with wheatgrass as a control) and a commonly used  
20 bacterial seed inoculation treatment meant to increase root nodulation. We tested seed sets using  
21 choice tests housed in seed depots located within the foraging range of ant colonies with no prior  
22 exposure to the selected seeds. Of the evaluated cover crop seeds, wheatgrass and oat were the  
23 first to be removed entirely from the depot, with vetch remaining after 24 h. When we inoculated  
24 the two most preferred seeds to determine if there was a preference for non-inoculated seeds, we  
25 found no difference between inoculated and non-inoculated seeds. There were also significant  
26 changes in activity over time for both trials. These data indicate that harvester ant foraging  
27 preferences and activity can inform grower management recommendations regarding the risks of  
28 using certain cover crops and months sowing should be conducted in fields with known harvester  
29 ant presence.

30

31 **Key Words:** bacterial inoculum, Lower Rio Grande Valley, seed depot study, seed preference

## 32 **Introduction**

33 Harvester ants in the genus *Pogonomyrmex* commonly reside in arid to semi-arid regions  
34 of the Americas and can be found in a range of habitats including agricultural and peri-urban  
35 matrices (Luna et al. 2018; Viera-Neto et al. 2016; Tizón et al. 2010; MacMahon 2000). The  
36 state of Texas has 12 species of harvester ants with the red harvester ant (*Pogonomyrmex*  
37 *barbatus* Smith) being the most common in the Lower Rio Grande Valley (LRGV), an  
38 agriculturally rich location with a semi-arid sub-tropical climate (Martinez et. al., 2020, Davis,  
39 2016). Harvester ant foraging occurs mainly along trails that extend from the colony to  
40 neighboring food sources within their foraging range (Taber, 1999; Traniello, 1989). While  
41 foraging trails average 10 m long, colony-dense areas (which may have over 80 nests/hectare)  
42 have trails extending up to 60 m from the nest site (Reed and Landolt, 2019). Harvester ants,  
43 primarily granivores, use these trails to collect seeds located on the soil surface, often from or  
44 surrounding the parent plant (MacKay and MacKay 2002; Taber, 1999). *P. barbatus*, *P. rugosus*  
45 Emery, *P. occidentalis* Cresson, and *P. salinus* Olsen species tend to harvest near the trunk of  
46 their foraging trails which are shaped by seed distribution, disturbances, or inter/intra-species  
47 interactions (MacMahon, 2000; Traniello, 1989).

48 Harvester ants exhibit seed preferences based on a combination of relative seed  
49 abundance, size/shape, and nutritional content of the seeds (Penn and Crist, 2018; MacMahon,  
50 2000; Taber 1999). For instance, *P. occidentalis* Cresson prefers to forage with high species  
51 fidelity in seed-dense patches, which can reduce local seed bank heterogeneity (Luna et al. 2018;  
52 MacMahon, 2000; Crist and MacMahon, 1991). When the seed bank has low seed diversity, ants  
53 will collect less preferred seed varieties until more desirable seeds are available (MacMahon,

54 2000). When more preferred seeds return, ants will empty colony seed stores of the less desired  
55 seeds to replace them with preferred options (MacMahon, 2000).

56 Harvester ant seed foraging is not limited to natural areas and may occur in agricultural  
57 matrices where seed preferences may benefit or harm crop production. Although harvester ants  
58 are known to consume weed seeds, their seed preferences may also include consumption of crop  
59 seeds (Barbercheck and Wallace, 2021; Baraibar et al. 2011; Taber, 1999). Ant removal of crop  
60 seeds and vegetation causes economic loss, especially if the crop is situated within areas of high  
61 colony density (Reed and Landolt, 2019; Borth, 1982). Red harvester ants in particular are found  
62 in agricultural areas in the LRGV and may have a large impact on the plant community through  
63 removal of vegetation surrounding their nest entrance (1-5 m in diameter) or through seed  
64 collection (Reed and Landolt, 2019; MacMahon and Crist, 2000)

65 In addition to cash crops, harvester ants in agricultural fields may forage on cover crop  
66 seeds (based on personal communications) but have not been well documented. In the LRGV,  
67 cover crops are used during fallow periods to prevent soil erosion from wind or water (Soti and  
68 Racelis, 2020; Martinez et al., 2020; Nicolas Labrière, 2015; Bodner et al., 2010 Yu et al., 2000).  
69 Presumably, if an ant-preferred seed is sown within the foraging range of a colony, it will not  
70 have time to germinate before being taken by a forager to the colony granary. The lack of a root  
71 system and above-ground vegetation in the foraged field area can then potentially increase  
72 economic loss for the farmer (Soti and Racelis, 2020; Martinez et al., 2020; Bodner et al., 2010).  
73 So, preventing harvester ant interference with cover crops could potentially reduce soil exposure  
74 to erosion as well as save the cost of having to re-seed foraged areas.

75           The primary objective of the study was to determine red harvester ant preferences for  
76 commonly used cover crop seeds in the LRGV. We chose members of the families Fabaceae,  
77 Poaceae, and Brassicaceae that are currently being evaluated by farmers in the LRGV - hairy  
78 vetch (*Vicia villosa*), oat (*Avena sativa*), sunn hemp (*Crotalaria juncea*), radish (*Raphanus*  
79 *sativus*), and fescue (*Festuca arundinacea*). Wheatgrass (Poaceae: *Triticum aestivum*) was also  
80 included as a known preferred food for harvester ants and served as a control for the  
81 experiments (Brito-Bersi et al., 2018; Ryti and Case, 1988). Based on known baseline  
82 preferences that harvester ants exhibit towards grasses, we anticipated that oat, fescue, and  
83 wheatgrass would be most preferred as they are sugar-rich grasses from the family Poaceae.  
84 (MacMahon, 2000; Taber 1999). In addition to the use of cover crops, LRGV farmers may  
85 inoculate cover crop seeds with nitrogen-fixing bacteria to facilitate root nodulation to further  
86 benefit the soil (Rai et al., 2021; Kasper et al., 2019; Kasper 2019). As such treatments may  
87 influence ant foraging decisions, the second objective was to determine if seed inoculation  
88 treatments used for increased germination rates would alter the previously established cover  
89 crop seed preferences.

90

## 91 **Methods:**

### 92 *Site Description*

93           The study site was located within the Lower Rio Grande Valley in South Texas. This area  
94 is considered a local steppe climate that is subtropical subhumid marine with an average annual  
95 temperature of 24°C (16.3-30.2°C) and 572 mm of precipitation. Soils in these regions of the Rio  
96 Grande Plain are considered deep loamy soils with moderately sloped planes and an average  
97 altitude of 34 m (USDA, 2008). Specifically, all trials were conducted at the University of Texas

98 at Rio Grande Valley (UTRGV) campus (~ 1.5 km<sup>2</sup>) in Edinburg, Hidalgo County, TX, USA  
99 (26.306667, -98.170944). This site was selected as the ants present would have no prior exposure  
100 to the species of seeds presented during the study, but would also still experience disturbance  
101 pressures such as irrigation and routine mowing (a proxy for agricultural practices relative to  
102 natural settings).

103 On the campus, most vegetation included grasses used for lawns intermixed with weeds  
104 (primarily grass burr/sticker burr) and punctuated by standard suburban ornamental plants (such  
105 as Tropical Milkweed (*Asclepias curassavica*) and *Lantana sp.*). As of publication of the 2020  
106 Tree Campus USA Report, there are 53 different species of trees with Live Oak (*Quercus*  
107 *virginiana*), Texas Ebony (*Ebenopsis ebano*), and Honey Mesquite (*Prosopis glandulosa*) being  
108 noteworthy examples (UTRGV Office For Sustainability, 2021). The immediate land use  
109 surrounding the study site is considered a combination of suburban and peri-urban with  
110 intermixed sorghum fields, pasture, and citrus groves. Land use within the LRGV more generally  
111 also includes mixed fruit and vegetable crops as well as sugarcane production. Active  
112 *Pogonomyrmex* colonies (n = 37) with no prior exposure to cover crop seeds near were mapped  
113 throughout the site using an eXplorist 610 GPS unit (Magellan, San Dimas, CA, USA). Colony  
114 activity was determined by whether there were foraging trails present with active bidirectional  
115 ant traffic.

#### 116 *Seed Preference Trials*

117 To determine whether size differences between seeds could impact preference, 10 seeds  
118 of each variety were weighed and averaged and seed texture was noted. For the trial, the cover  
119 crop seeds - hairy vetch (Johnny's Selected Seeds, Winslow, ME), oat, sunn hemp (Johnny's  
120 Selected Seeds, Winslow, ME), wheatgrass (Todd's Seeds, Livonia, MI), radish (Johnny's

121 Selected Seeds, Winslow, ME), and fescue (GreenCover, Bladen, NE) - were pre-counted in  
122 groups of 10 seeds per cover crop and stored in microcentrifuge tubes at room temperature  
123 before transport to the field. Seed depots were constructed out of I-plate Petri dishes (100 mm ×  
124 15 mm). Petri dishes were sanded to produce a rough surface to increase traction, and 3 U-  
125 shaped entrances were created with a soldering iron at 45° and 90° angles on each half of the  
126 Petri dish to allow for easy ant entry to the dish.

127         The seed depot was placed 2 m from the nest entrance along the primary foraging trail  
128 with seed depot entrances facing the foraging trail (see supplemental materials for optimization  
129 of depot placement and depot construction). Upon initiation of each trial, the seeds were placed  
130 into a depot, with even numbers per side and a total of 10 seeds per cover crop available per  
131 colony. After the addition of the seeds, cages (1 cm × 1 cm hardware cloth [Everbilt, The Home  
132 Depot, Atlanta, GA] shaped into a 23 cm × 23 cm square) were placed on top of the depots and  
133 secured into the ground with 3 cm fence staples to prevent vertebrate removal of the seeds and  
134 indicate human interference (Campagnoli and Christianini, 2021; Thompson et al., 2016; Hughes  
135 and Westoby, 1990). Seed removal was documented at intervals of 1, 2, 4, and 24 h. During each  
136 inspection, temperature, wind speed, and cloud cover percentage were measured and the seeds  
137 within and outside of the depots were counted. Seed preference trials were conducted from  
138 February to June 2020 in groups of 8-10 colonies per observation period. The tested colonies  
139 (n=37) were a minimum of 10 m apart to prevent overlap of colony foraging. All trials were  
140 conducted within a temperature range of 20.5-36.6°C and wind speeds ≤ 32km/h to optimize ant  
141 foraging time but minimize the risk of wind overturning the seed depots.

142         Due to a delay in shipping, the colonies observed in the first two days of trials (n=12)  
143 were not immediately exposed to fescue seeds. These colonies were re-tested later with a depot

144 mix including fescue seeds. They were compared to colonies that were exposed to fescue from  
145 the start and they did not demonstrate any difference in preference. Because of this lack of  
146 difference, we decided to use the full data set from the second round of trials from the initial  
147 twelve colonies for data analyses.

148

### 149 *Seed Inoculation Trials*

150 The experimental design for the seed inoculation trials was conducted in a similar manner  
151 to the seed preference trials. The same colonies (n=34) and number of colonies per observation  
152 period (n=8-10) were used. To differentiate which side held inoculated seeds and which held  
153 non-inoculated, the underside of depots were marked with a small section of tape. Two preferred  
154 seeds from the seed preference trials belonging to different plant families (wheatgrass and  
155 radish) were used to ensure that any inoculation effects would not be confused with lack of  
156 preference. Seeds were inoculated in the laboratory with the Guard-N Omri Seed Inoculant  
157 (Johnny's Selected Seeds, Winslow, ME) via slurry method. For every 90 g of seeds, 0.7 g of  
158 inoculant was added to the container and shaken. Seeds were stored at room temperature in a  
159 marked microcentrifuge tube until use in the field. Trials were completed between July and  
160 August 2020 according to the previously used seed preference methods.

161

### 162 *Statistical Analysis*

163 R version 3.6.2 (RStudio Team, 2020) was used to conduct all statistical analyses. Within  
164 each dataset, each seeds' time to removal was categorized individually with censoring due to  
165 external events (e.g., flipped depots due to high wind speeds, removal of the cage prior to the 24  
166 hours period, etc.) denoted. The survdiff function from the survival package was used to



167 determine if there was a significant difference in ant cover crop preference (Therneau, 2015;  
168 Therneau and Grambsch, 2000). The Kaplan-Meier survival estimator, which estimates the  
169 likelihood of an event occurring at a point in time, was used to calculate seed removal event  
170 likelihood over time (Johnson, 2018). The log-rank test using the lifelines package (Rickert,  
171 2017), a hypothesis test that compares the survival distribution between two samples, was used  
172 to compare the survival distribution of cover crop seeds to the wheatgrass and non-inoculated  
173 controls. To further investigate these differences while incorporating other variables such as  
174 observation month, we used Cox proportional hazard models and preferences compared against  
175 the wheatgrass standard using the ggforest function from the survival package (Therneau, 2015;  
176 Therneau and Grambsch, 2000).

177

## 178 **Results**

### 179 *Seed Preference Trials*

180 Kaplan Meier survival curves were used to compare removal rates of the different cover  
181 crop seed varieties (Fig. 1). The Cox proportional hazards model determined the only significant  
182 differences in removal were between wheatgrass and vetch ( $p < 0.001$ ), wheatgrass and sunn  
183 hemp ( $p < 0.001$ ), and wheatgrass and fescue ( $p < 0.050$ ), (Fig. 2; Table 1). During the trials,  
184 ants exhibited a preference for wheatgrass and oat seeds, often removing all the seeds before 24  
185 h (Table 1). For differences between seed types outside of wheatgrass, a pairwise log rank test  
186 was used.

187 The pairwise log rank test provided differences in survival between the seeds amongst  
188 themselves (Table 2). Vetch and Sunnhemp, though not significantly different from one another,  
189 were the varieties that were significantly less harvested in comparison to other seed types outside

190 of wheatgrass. Overall, vetch was found to be significantly less harvested when compared to oat  
191 ( $p < 0.050$ ), wheatgrass ( $p < 0.001$ ) or radish ( $p < 0.050$ ). Sunn hemp was found to be  
192 significantly less harvested when compared to oat ( $p < 0.005$ ), wheatgrass ( $p < 0.001$ ), or radish  
193 ( $p < 0.003$ ) (Fig. 2; Table 2). Similarly to the Cox proportional hazards model, Fescue, while not  
194 being significantly different from vetch or sunn hemp, was significantly less harvested than  
195 wheatgrass ( $p < 0.050$ ), another member of the Poaceae family. Other than seed types, seed  
196 collection differed among months (Supplementary Fig. 1). Over time, seed collection  
197 significantly decreased from February to June (Supplementary Fig. 1).

198         The physical characteristics of the seeds in the depot did not appear to affect preference  
199 as the preferred seeds in the study did not consistently share characteristics. Non-preferred seeds  
200 also did not share seed shape or texture, only color and nitrogen-fixing abilities. All the seeds'  
201 weights were similar with the exception of fescue and radish, which were significantly lighter  
202 than the other varieties (Fig. 3). Vetch and radish shared physical characteristics - both were  
203 round and uneven in texture, but they were treated differently by the ants. Sunn hemp was  
204 smooth, and bean shaped, while oat and fescue appeared fibrous towards the ends with a thin and  
205 elongated shape. Wheatgrass was oblong in shape and relatively smooth.

206

### 207 *Seed Inoculum Trial*

208         Unlike the seed preference trials, inoculum trials did not indicate significant differences  
209 in preference. The Kaplan Meier curve created from the collected data further demonstrated the  
210 visual lack of preference between inoculated versus non-inoculated seed between the same seed  
211 type (Fig. 4). Additionally, the Cox proportional hazards data demonstrated that the difference in  
212 preference between the inoculated and non-inoculated seeds was not significant (Fig. 5; Table 3).

213 This lack of overall preference also meant that there was no preference between one another  
214 (Table 4). Surprisingly, the only significance found within the trial was a change in seed removal  
215 (Supplementary Fig. 2). Depot harvesting was significantly higher in July in comparison to June  
216 or August.

217

## 218 **Discussion**

219 The goal of the study was to determine if red harvester ants exhibit preferences among  
220 different cover crop seed varieties and whether inoculating preferred seed types with nitrogen-  
221 fixing bacteria would inhibit the desirability of the seed. We introduced naive harvester ants to  
222 agricultural seeds via seed depots deployed over 24 h. We found that harvester ants had a  
223 significant preference for grass seeds and radish seeds compared to nitrogen-fixing sunn hemp  
224 and vetch seeds. However, we did not observe any difference in preference between inoculated  
225 and non-inoculated seeds of either wheatgrass or radish.

226 We had assumed harvester ants would prefer to forage on certain seeds based on physical  
227 characteristics and family (Poaceae) (Penn and Crist, 2018; MacMahon, 2000; Taber 1999). As  
228 anticipated due to prior work on seed preferences in natural areas, all grass seeds were similarly  
229 preferred. However, the attributes of radish overlapped with the less preferred seeds in terms of  
230 shape, color, or weight, indicating these physical traits were not the only driver of preference  
231 within this context (MacMahon, 2000; Taber 1999).

232 Alternatively, seed preferences could have been based on seed availability in the  
233 surrounding habitat, which likely changed from February 2020 to August 2020. During the  
234 study, we observed native seed burrs (Genus *Cenchrus* L.) being taken into the colony often as  
235 well as smaller grass seeds. Prior documentation of burrs in and around Hidalgo county indicates

236 that burrs are annual grasses with an affinity for frequently disturbed sites such as roadsides,  
237 similar to the study sites (Goel et al., 2011; Shaw, 2011). *Cenchrus echinatus* L. begin to  
238 germinate in the late spring, continuing through the fall (Smith et al., 2012; Cope & Gray, 2009).  
239 The decrease in seed removal from trials that occurred from spring to summer could be a change  
240 in priority from depot seeds to collecting recently germinated seeds from the surrounding  
241 *Cenchrus sp.* Given these observations, the interactions of cover crop seeds with weed banks  
242 within agricultural settings needs to be evaluated further, particularly in regards to sowing  
243 timing. Outside of seed preference changes due to the surrounding seed pool, *P. barbatus*  
244 activity is closely related to rainfall, peaking in the summer months and correlated with overall  
245 seed availability. With additional rainfall, more grasses outside of drought resistant varieties such  
246 as *Cenchrus sp.* potentially germinated, allowing for more diversity in the seed pool  
247 (MacMahon, 2000; Smith et al., 2012; Cope & Gray, 2009). The additional surrounding native  
248 seeds could have been another cause for the reduction in depot harvesting over time from  
249 February to June. Alternatively, during the sudden increase in depot harvesting from June to July  
250 could be in preparation for August, which is usually known for its higher temperatures. In  
251 August, activity significantly decreased in comparison to both June and July, implying that high  
252 amounts of collection in June could have been done to avoid excess water loss for the colonies in  
253 August (Supplementary Fig. 2)

254 Another interesting, isolated event was recorded on July 23rd, 2020, two days prior to the  
255 touch down of Hurricane Hanna in the LRGV. Within one hour, 8 of 9 colonies had completely  
256 emptied the depots. The impacts of such weather events are known to affect insect behavior in  
257 response to changes in barometric pressure; many insects exhibit sudden insatiable appetites  
258 likely preparing for weather events that follow. (Fernando R. Sujimoto, 2019; Flitters, 1963).

259 Leaf-cutter ants have been observed to significantly increase foraging during periods of low  
260 barometric pressure, and harvester ants may do the same (Fernando R. Sujimoto, 2019). Future  
261 studies regarding the correlation between harvester ant foraging intensity and barometric  
262 pressure could help determine risk during certain planting dates in regions along the gulf coast  
263 that have the potential to experience tropical cyclones annually.

264 Harvester ants have been previously observed to have contradictory behavior regarding  
265 the same seed species based on other aspects such as seed germination or fungal infection  
266 (MacMahon et al., 2000; Taber, 1999; Crist and Friese, 1993). However, in our trials, inoculated  
267 and non-inoculated seeds were not treated differently, indicating that the presence of nitrogen-  
268 fixing bacteria did not inhibit or encourage harvester ant predation. Regardless, there is  
269 conflicting data regarding the amount of microbial diversity/biomass within the soil around ant  
270 colonies (Ginzburg et al., 2008; Boulton et al., 2003; Wagner et al., 1997). *Pogonomyrmex*  
271 *barbatus* in the study showed no preference towards or against inoculated seeds, hinting that  
272 their granaries could be potentially rich in microbial activity. Alternatively, harvester ants do  
273 partake in seed cleaning behavior that could occur at any point prior to introduction to the  
274 granary.

275 In subtropical areas such as the LRGV, prior studies recommend the use of warm season  
276 cover crops due to subtropical climate and promotion of native mycorrhizal fungi (Soti et al.  
277 2016; Rugg, 2016). Based on the data collected in this study, harvester ants were exhibited lower  
278 levels of preference towards certain seed varieties such as sunn hemp. The benefits that these  
279 nitrogen fixing varieties, such as sunn hemp, hold towards the soil can be extremely beneficial.  
280 Sunn hemp, for example, conserves phosphorus in the soil, increases nitrates, and has the  
281 potential to improve soil health in subtropical agroecosystems such as the LRGV (Soti et al.

282 2016; Rugg, 2016; Mansoar et al. 1997). Not only does sunn hemp have the potential to be an  
283 excellent South Texas cover crop, but it is also increasing in popularity in other southern areas of  
284 the U.S. like Florida and Louisiana. Similarly, hairy vetch also has potential to be a great cover  
285 crop due to the low ant preference and its weed suppression and nitrogen-fixing abilities (Moran  
286 and Greenberg, 2008). Given these cover crops are not preferred over grasses in the seed depot  
287 study, which are common in the non-crop habitats surrounding LRGV crop fields, harvester ants  
288 would likely predate on surrounding weeds and grasses instead of the chosen cover crop.

289 Harvester ants can be a substantial disturbance agent in arid to semi-arid regions of the  
290 United States and Mexico. *Pogonomyrmex sp.* have a pest status for seed collection and plant  
291 removal in agricultural areas and can remove up to 100% of a preferred seed within their  
292 foraging range (Crist and MacMahon, 1992; Tabber, 1999). Our data suggests we can  
293 recommend nitrogen-fixing cover crops like sunn hemp and vetch to farmers as a potential cover  
294 crop during fallow periods and could be paired with the fact that seed inoculation is neither  
295 preferred or rejected by harvester ants. Inoculating these nitrogen-fixing seeds could help with  
296 nodulation, nitrogen-fixing processes, and benefit the soil health below ground while protecting  
297 topsoil from erosion. Not only that, using the pair for a cover crop trial, could in turn encourage  
298 harvester ant predation on weed species or surrounding native plants that could limit crop yields  
299 (Baraibar et al., 2011). Additional research should be conducted regarding harvester ant  
300 preferences. For example, conducting preference studies with rural harvester ants that have more  
301 exposure to different agricultural seed varieties and in turn, potential differences in preferences.  
302 A better understanding of harvester ant seed preferences can be used to encourage predation on  
303 native or weed seeds while reducing the need to eradicate native harvester ant colonies.

304

305 **Acknowledgements**

306 Funding support for LE was provided by the Dean's Graduate Research Assistantship  
307 from UTRGV. We would like to thank the Racelis' Agroecology Lab at UTRGV for providing  
308 the seeds used in the experiment, as well as the inoculum.

309

310 **Literature Cited**

311

312 Baraibar, B., Ledesma, R., Royo-Esnal, A., & Westerman, P. R. (2011). Assessing yield losses  
313 caused by the harvester ant *Messor barbarus* (L.) in winter cereals. *Crop Protection*, 30(9), 1144-  
314 1148.

315 Barbercheck, M. E., & Wallace, J. (2021). Weed–Insect Interactions in Annual Cropping  
316 Systems. *Annals of the Entomological Society of America*, 114(2), 276-291.

317 Bodner, G., Himmelbauer, M., Loiskandl, W., & Kaul, H. P. (2010). Improved evaluation of  
318 cover crop species by growth and root factors. *Agronomy for sustainable development*, 30(2),  
319 455-464.

320 Borth, P. W. T., B. R.; Johnson, G. D. (1982). A Preliminary Evaluation of Amdro for Control of  
321 a Harvester Ant (*Pogonomyrmex maricopa* Wheeler) in Hard Red Spring Wheat. Forage and  
322 Grain: A College of Agriculture Report. 39-41.

323 Boulton, A. M., Jaffee, B. A., & Scow, K. M. (2003). Effects of a common harvester ant (*Messor*  
324 *andrei*) on richness and abundance of soil biota. *Applied Soil Ecology*, 23(3), 257-265.

325 Brito-Bersi, T., Dawes, E., Martinez, R., & McDonald, A. (2018). Seed preference in a desert  
326 harvester ant, *Messor pergandei*. *California Ecology and Conservation Research*, 1-6.

- 327 Campagnoli, M. L., & Christianini, A. V. (2021). Temporal consistency in interactions among  
328 birds, ants, and plants in a neotropical savanna. *Nordic Society Oikos*, 00: 1–13
- 329 Cope, T. & Gray, A. (2009). *Grasses of the British Isles*. Botanical Society of the British Isles  
330 No.13.
- 331 Crist, T. O., & Friese, C. F. (1993). The impact of fungi on soil seeds: implications for plants and  
332 granivores in a semiarid shrub-steppe. *Ecology*, 74(8), 2231-2239.
- 333 Crist, T. O., & MacMahon, J. A. (1992). Harvester ant foraging and shrub-steppe seeds:  
334 interactions of seed resources and seed use. *Ecology*, 73(5), 1768-1779.
- 335 Davidson, D. W. (1982). Sexual selection in harvester ants (Hymenoptera: Formicidae:  
336 *Pogonomyrmex*). *Behavioral Ecology and Sociobiology*, 10(4), 245-250.
- 337 Davis, J. M. (2016). Management of the Red Harvester Ant  
338 *Pogonomyrmex barbatus*. Texas Parks and Wildlife Department.  
339 [https://tpwd.texas.gov/huntwild/wild/wildlife\\_diversity/texas\\_nature\\_trackers/horned\\_lizard/doc](https://tpwd.texas.gov/huntwild/wild/wildlife_diversity/texas_nature_trackers/horned_lizard/documents/harvester_ant_management.pdf)  
340 [uments/harvester\\_ant\\_management.pdf](https://tpwd.texas.gov/huntwild/wild/wildlife_diversity/texas_nature_trackers/horned_lizard/documents/harvester_ant_management.pdf)
- 341 Flitters, N. E. (1963). Observations on the effect of hurricane “Carla” on insect activity.  
342 *International Journal of Biometeorology*, 6(2), 85-90.
- 343 Friese, C. F., & Allen, M. F. (1993). The interaction of harvester ants and vesicular-arbuscular  
344 mycorrhizal fungi in a patchy semi-arid environment: the effects of mound structure on fungal  
345 dispersion and establishment. *Functional Ecology*, 13-20.
- 346 Ginzburg, O., Whitford, W. G., & Steinberger, Y. (2008). Effects of harvester ant (*Messor spp.*)  
347 activity on soil properties and microbial communities in a Negev Desert ecosystem. *Biology and*  
348 *fertility of Soils*, 45(2), 165-173.



- 349 Goel S., Singh H.D., Raina S.N. (2011) *Cenchrus*. In: Kole C. (eds) *Wild Crop Relatives:*  
350 *Genomic and Breeding Resources*. Springer, Berlin, Heidelberg. <https://doi.org/10.1007/978-3->  
351 [642-14255-0\\_3](https://doi.org/10.1007/978-3-642-14255-0_3)
- 352 Graeber, K. N., and G Leubner-Metzger,. (2017). *Encyclopedia of Applied Plant Sciences*  
353 (Second Edition). 1, 483-489. doi: <https://doi.org/10.1016/B978-0-12-394807-6.00209-4>
- 354 Hughes, L., & Westoby, M. (1990). Removal Rates of Seeds Adapted for Dispersal by Ants.  
355 *Ecology*, 71(1), 138–148. doi: <https://doi.org/10.2307/1940254>
- 356 Johnson, L. L. (2018). An Introduction to Survival Analysis. *Principles and Practice of Clinical*  
357 *Research*, 4, 373-381. doi:10.1016/B978-0-12-849905-4.00026-5
- 358 Johnson, R. A. (1998). Foundress survival and brood production in the desert seed-harvester ants  
359 *Pogonomyrmex rugosus* and *P. barbatus* (Hymenoptera, Formicidae). *Insectes Sociaux*, 45(3),  
360 255-266.
- 361 Landré, J. W. (1990). Soil moisture patterns below mounds of harvester ants. *Rangeland*  
362 *Ecology & Management/Journal of Range Management Archives*, 43(1), 10-12.
- 363 Kasper, S. L. (2019). Investigating Limitations to Nitrogen Fixation by Leguminous Cover Crops  
364 in South Texas. The University of Texas Rio Grande Valley.
- 365 Kasper, S., Christoffersen, B., Soti, P., & Racelis, A. (2019). Abiotic and biotic limitations to  
366 nodulation by leguminous cover crops in South Texas. *Agriculture*, 9(10), 209.
- 367 MacKay, W. P., & Mackay, E. (2002). *The ants of New Mexico (Hymenoptera: Formicidae)* (p.  
368 400). Lewiston, NY: Edwin Mellen Press.
- 369 MacMahon, J. A., Mull, J. F., & Crist, T. O. (2000). Harvester ants (*Pogonomyrmex spp.*): their  
370 community and ecosystem influences. *Annual Review of Ecology and Systematics*, 31(1), 265-  
371 291.

- 372 Mansoer, Z., Reeves, D. W., & Wood, C. W. (1997). Suitability of sunn hemp as an alternative  
373 late-summer legume cover crop. *Soil Science Society of America Journal*, 61(1), 246-253.
- 374 Moran, P. J., & Greenberg, S. M. (2008). Winter cover crops and vinegar for early-season weed  
375 control in sustainable cotton. *Journal of Sustainable Agriculture*, 32(3), 483-506.
- 376 Labrière, N., Locatelli, B., Laumonier, Y., Freycon, V., & Bernoux, M. (2015). Soil erosion in  
377 the humid tropics: A systematic quantitative review. *Agriculture, Ecosystems & Environment*,  
378 203, 127-139.
- 379 Penn, H. J., & Crist, T. O. (2018). From dispersal to predation: A global synthesis of ant–seed  
380 interactions. *Ecology and evolution*, 8(18), 9122-9138.
- 381 Rai, Q., Choudhury, R. A., Soti, P., & Racelis, A. (2021). Rhizobial adhesives enhance nodule  
382 formation in sunn hemp. *bioRxiv*.
- 383 Reed, H. C., & Landolt, P. J. (2019). Ants, wasps, and bees (Hymenoptera). In *Medical and*  
384 *veterinary entomology* (pp. 459-488). Academic Press.
- 385 Rickert, J. (2017). Survival analysis with R. In: RStudio (Ed.) *R Views: R Community Blog*.  
386 Boston, MA. Retrieved from <https://rviews.rstudio.com/2017/09/25/survival-analysis-with-r/>.
- 387 RStudio Team (2020). *RStudio: Integrated Development for R*. RStudio, PBC, Boston, MA URL  
388 <http://www.rstudio.com/>.
- 389 Rugg, S. M. (2016). *Multifunctionality of Cover Crops on Organic Vegetable Farms in South*  
390 *Texas*. The University of Texas Rio Grande Valley.
- 391 Ryti, R. T., & Case, T. J. (1988). Field experiments on desert ants: testing for competition  
392 between colonies. *Ecology*, 69(6), 1993-2003.
- 393 Shakeel, M., Ali, H., Ahmad, S., Said, F., Khan, K. A., Bashir, M. A., . . . Ali, H. (2019). Insect  
394 pollinators diversity and abundance in *Eruca sativa Mill.* (Arugula) and *Brassica rapa L.* (Field

395 mustard) crops. Saudi Journal of Biological Sciences, 26(7), 1704-1709. doi:  
396 <https://doi.org/10.1016/j.sjbs.2018.08.012>.

397 Shaw, R. B. (2011). Guide to Texas grasses. Texas A&M University Press.

398 Smith, H., Ferrell, J., & Sellers, B. (2012). Identification and Control of Southern Sandbur  
399 (*Cenchrus echinatus* L.) in Hayfields. EDIS, 2012(12).

400 Snyder, S. R., & Friese, C. F. (2001). A survey of arbuscular mycorrhizal fungal root inoculum  
401 associated with harvester ant nests (*Pogonomyrmex occidentalis*) across the western United  
402 States. Mycorrhiza, 11(3), 163-165.

403 Soti, P., & Racelis, A. (2020). Cover crops for weed suppression in organic vegetable systems in  
404 semiarid subtropical Texas. Organic Agriculture, 10(4), 429-436.

405 Sujimoto, C. M. C., Caio H. L. Zitelli, José Maurício S. Bento. (2019). Foraging activity of  
406 leaf-cutter ants is affected by barometric pressure. Ethology. doi:10.1111/eth.12967.

407 Terry M. Therneau, Patricia M. Grambsch (2000). *Modeling Survival Data: Extending the Cox  
408 Model*. Springer, New York. ISBN 0-387-98784-3.

409 Therneau T (2015). *A Package for Survival Analysis in S*. version 2.38, <URL:  
410 <https://CRAN.R-project.org/package=survival>>.

411 Thomson, F. J., Auld, T. D., Ramp, D., & Kingsford, R. T. (2016). A switch in keystone seed-  
412 dispersing ant genera between two elevations for a myrmecochorous plant, *Acacia terminalis*.  
413 Plos one, 11(6), e0157632.

414 Tizon, F. R., Peláez, D. V., & Elía, O. R. (2010). Efecto de los cortafuegos sobre el ensamble de  
415 hormigas (Hymenoptera, Formicidae) en una región semiárida, Argentina. Iheringia. Série  
416 Zoología, 100, 216-221.

417 Treadwell, D. D., & Alligood, M. (2008). Sunn hemp (*Crotalaria juncea L.*): A summer cover  
418 crop for Florida vegetable producers. EDIS, 2008(2).

419 UTRGV Office For Sustainability. (2021). 2020 Tree Campus USA Report. Issuu. Retrieved  
420 December 2, 2021, from  
421 [https://issuu.com/officeforsustainability/docs/2020\\_tree\\_campus\\_report-\\_final\\_5\\_](https://issuu.com/officeforsustainability/docs/2020_tree_campus_report-_final_5_).

422 Vieira□Neto, E. H., Vasconcelos, H. L., & Bruna, E. M. (2016). Roads increase population  
423 growth rates of a native leaf□cutter ant in Neotropical savannas. *Journal of Applied Ecology*,  
424 53(4), 983-992.

425 Uhey, D. A., Cummins, G. C., Rotter, M. C., Lassiter, L. S., & Whitham, T. G. (2021). Hiking  
426 Trails Increase Abundance of Harvester Ant I Nests at Clear Creek, Arizona. *Southwestern*  
427 *Entomologist*, 46(2), 403-412.

428 United States Department of Agriculture Natural Resources Conservation Service. (2008). Texas  
429 General Soil Map. General Soil Map of Texas. Retrieved November 19, 2021, from  
430 [https://maps.lib.utexas.edu/maps/texas/texas-general\\_soil\\_map-2008.pdf](https://maps.lib.utexas.edu/maps/texas/texas-general_soil_map-2008.pdf).

431

## 432 **Figure Labels**

433 **Figure 1.** Kaplan Meier curve of seed types' likelihood of survival over the course of the seed  
434 preference trial based on selected data. (n=37 colonies). The dashed line indicates the overall  
435 median removal time.

436 **Figure 2.** Hazard Proportional Ratio test demonstrating differences in preferences between seed  
437 types. Reference is wheatgrass. Means on the right side of the chart indicate a larger number of  
438 seeds that were removed during the trial. Differences in n (observed seed number) were due to  
439 seeds that were censored for external events.

440 **Figure 3.** Differences in seed weight between the six cover crop seeds (n=50/seed type) used in  
441 the study. Boxplots are in the style of Tukey where the box limits represent the lower 25% and  
442 upper 75% quantile with the line representing the median. Tukey HSD was used to determine  
443 significance differences (denoted by letters) among seed weights.

444

445 **Figure 4.** Kaplan Meier curve of seed types' likelihood of survival over the course of the seed  
446 inoculation trial based on selected data. (n=34 colonies). The dashed line indicates the overall  
447 median removal time.

448 **Figure 5.** Hazard Proportional Ratio test demonstrating differences in preferences between  
449 inoculated and uninoculated seed types. Reference is wheatgrass. Means on the right side of the  
450 chart indicate a larger number of seeds that were removed during the trial. Differences in n  
451 (observed seed number) were censored for external events.

452

453

454 **Figures**

455

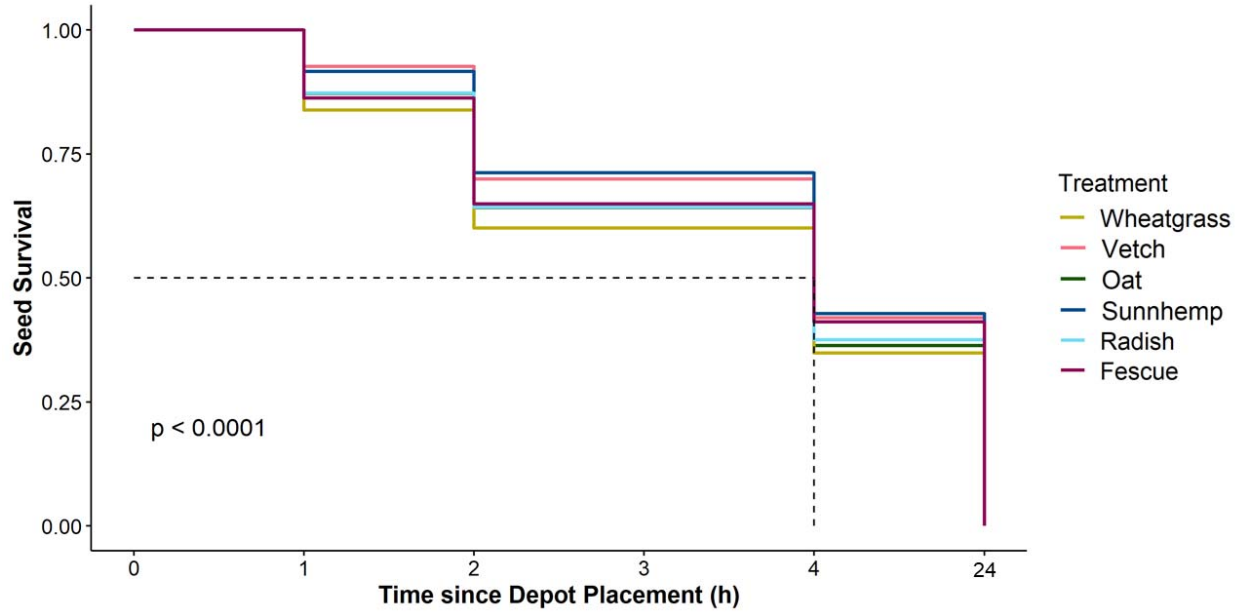

456

457 **Figure 1.** Kaplan Meier curve of seed types' likelihood of survival over the course of the seed  
458 preference trial based on selected data (n=37 colonies). The dashed line indicates the overall  
459 median removal time.

460

461

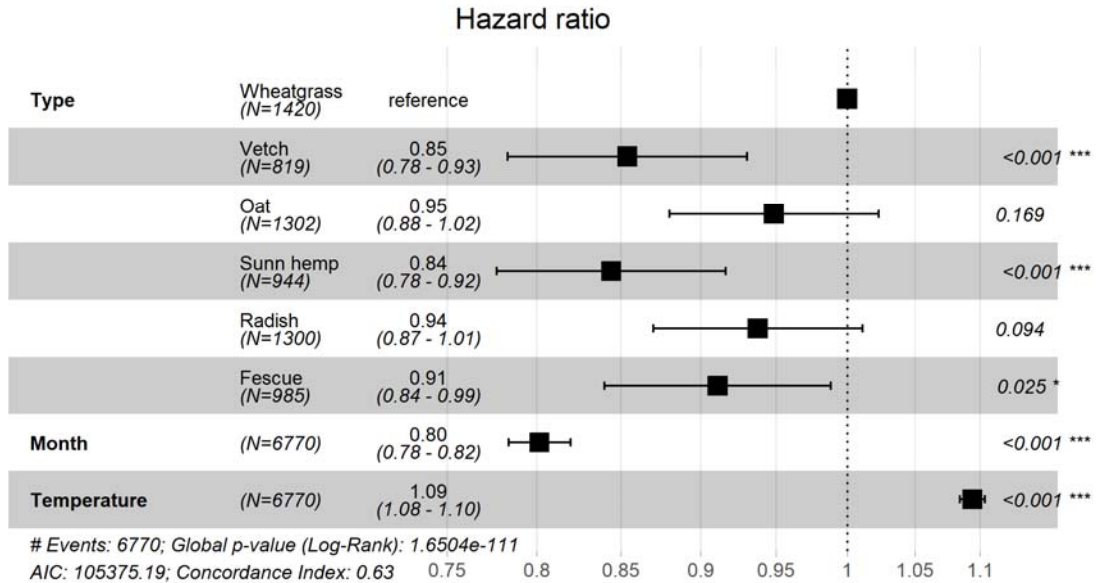

462

463 **Figure 2.** Hazard Proportional Ratio test demonstrating differences in preferences between seed  
 464 types. Reference is wheatgrass. Temperature is in Celsius. Means on the right side of the chart  
 465 indicate a larger number of seeds that were removed during the trial. Differences in n (observed  
 466 seed number) were due to censoring for external events.

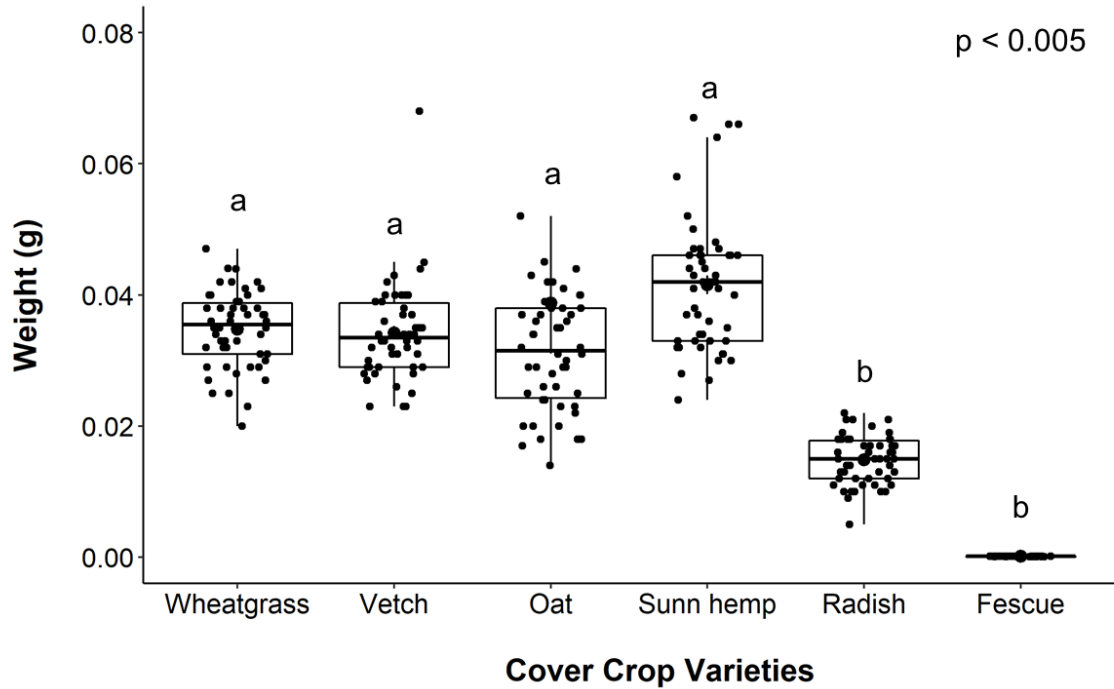

467

468 **Figure 3.** Differences in seed weight between the six cover crop seeds (n=50/seed type) used in  
469 the study. Boxplots are in the style of Tukey where the box limits represent the lower 25%  
470 quantile and upper 75% quantile with the line representing the median. Tukey HSD was used to  
471 determine significance differences (denoted by letters) among seed weights.



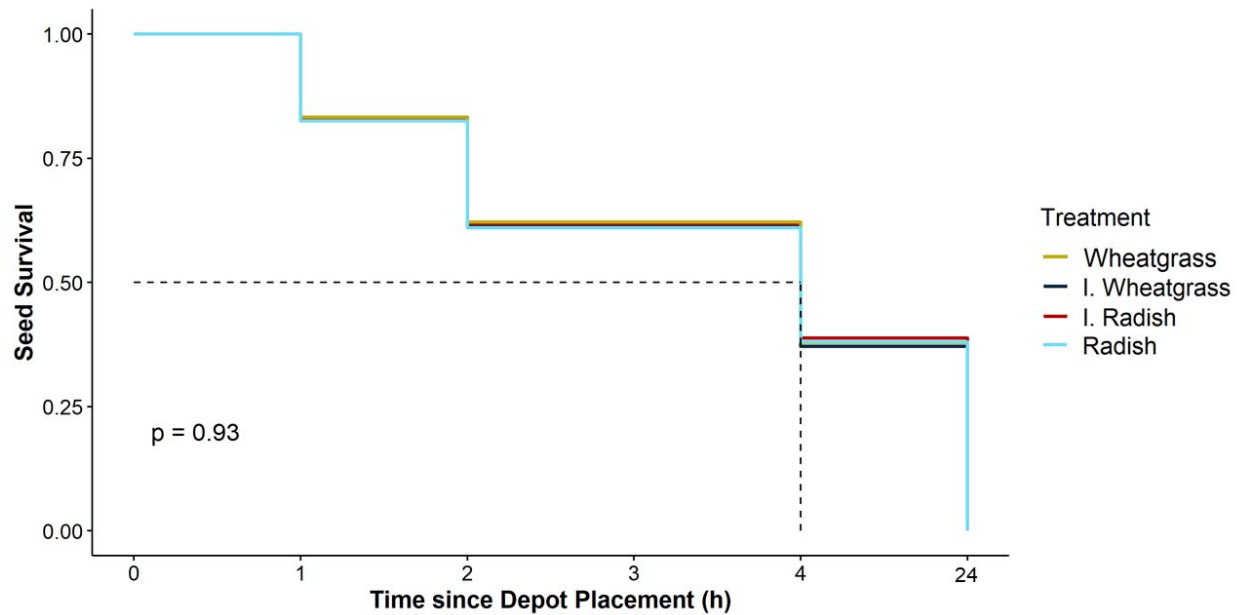

472

473 **Figure 4.** Kaplan Meier curve of seed types' likelihood of survival over the course of the seed  
474 inoculation trial based on selected data (n=34 colonies). The dashed line indicates the overall  
475 median removal time.

476

477

478

479

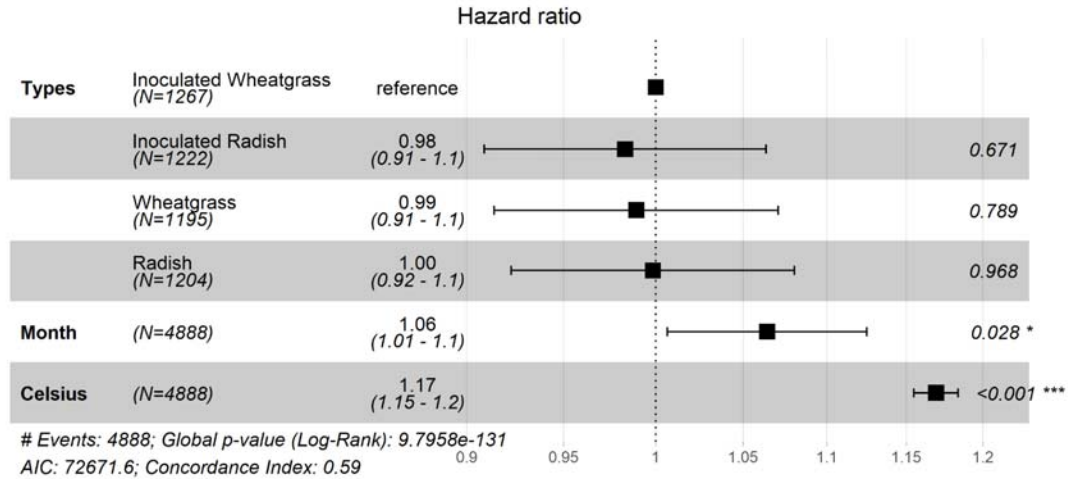

480

481 **Figure 5.** Hazard Proportional Ratio test demonstrating differences in preferences between  
 482 inoculated and uninoculated seed types as well as seed consumption differing between months..  
 483 Reference is wheatgrass. Means on the right side of the chart indicate a larger number of seeds  
 484 that were removed during the trial. Differences in type n (observed seed number) were due to  
 485 censoring for external events. Differences in Month n (observed seed number) was differences in  
 486 numbers of trials per month.

487

488

489

490

491

492

493

494

495 **Tables**

496 **Table 1.** Summary of the fitted cox model for cover crop seed preferences.

---

| <b>Cover Crop</b> | <b>coef</b> | <b>exp(coef)</b> | <b>se(coef)</b> | <b>z</b> | <b>P-value</b> |
|-------------------|-------------|------------------|-----------------|----------|----------------|
| Vetch             | 0.000       | 1.000            | 0.040           | -0.040   | 0.970          |
| Oat               | 0.000       | 1.000            | 0.040           | -0.080   | 0.930          |
| Sunn hemp         | 0.000       | 1.000            | 0.040           | -0.110   | 0.910          |
| Radish            | 0.010       | 1.010            | 0.040           | 0.150    | 0.880          |
| Fescue            | -0.170      | 0.840            | 0.040           | -4.130   | 0.000          |

---

497

498

499

500 **Table 2.** Pairwise comparisons using Log-Rank Test between seed types for the seed preference  
501 study (n = 6770 total seeds). Levels of significance indicated by asterisks.

|                   | <b>Vetch</b> | <b>Oat</b> | <b>Sunn hemp</b> | <b>Wheatgrass</b> | <b>Radish</b> |
|-------------------|--------------|------------|------------------|-------------------|---------------|
| <b>Oat</b>        | 0.003        |            |                  |                   |               |
| <b>Sunn hemp</b>  | 0.733        | <0.001     |                  |                   |               |
| <b>Wheatgrass</b> | <0.001       | 0.149      | <0.001           |                   |               |
| <b>Radish</b>     | 0.011        | 0.664      | 0.003            | 0.068             |               |
| <b>Fescue</b>     | 0.190        | 0.121      | 0.115            | 0.003             | 0.230         |

502

503

504

505

506

507

508

509

510

511

512

513

514 **Table 3.** Summary of the fitted cox model for inoculated seed preferences.

---

| <b>Cover Crop</b>     | <b>coef</b> | <b>exp(coef)</b> | <b>se(coef)</b> | <b>z</b> | <b>Pr(&gt; z )</b> |
|-----------------------|-------------|------------------|-----------------|----------|--------------------|
| Inoculated Wheatgrass | 0.010       | 1.010            | 0.040           | 0.260    | 0.750              |
| Inoculated Radish     | -0.010      | 0.990            | 0.040           | 0.680    | 0.820              |
| Radish                | 0.000       | 1.010            | 0.040           | 0.410    | 0.930              |

---

515

516

517

518

519

520

521

522

523

524

525

526

527

528

529
